# Supplementary material for: Scientist Spotlights: Online assignments to promote inclusion in Ecology and Evolution
Source: PubMed Central journal article supplement (PMC7679542; doi:10.1002/ece3.6849), 2020-10-08
Supplement: ECE3-10-12450-s001.pdf [file ECE3-10-12450-s001.pdf]

| Name                             | Position                                                                                                                                                                                                                                             | Area of Study                                                                                                                                            | Resources                                                                                                                                                                                                                                                                                                                                                                                                                                                                                                                                                                                                                                                                                                            |
|----------------------------------|------------------------------------------------------------------------------------------------------------------------------------------------------------------------------------------------------------------------------------------------------|----------------------------------------------------------------------------------------------------------------------------------------------------------|----------------------------------------------------------------------------------------------------------------------------------------------------------------------------------------------------------------------------------------------------------------------------------------------------------------------------------------------------------------------------------------------------------------------------------------------------------------------------------------------------------------------------------------------------------------------------------------------------------------------------------------------------------------------------------------------------------------------|
| <b>Dr. Maydianne Andrade</b>     | Professor and Vice-Dean at the University of Toronto - Scarborough                                                                                                                                                                                   | Reproductive behaviors and developmental plasticity in animals, especially arachnids                                                                     | <a href="https://vimeo.com/16475149">https://vimeo.com/16475149</a>                                                                                                                                                                                                                                                                                                                                                                                                                                                                                                                                                                                                                                                  |
| <b>Dr. Shane Campbell-Staton</b> | Assistant Professor of Biology at University of California - Los Angeles                                                                                                                                                                             | Integrates physiology, genomics, and field work to study how complex phenotypes respond to anthropogenic climate change                                  | <a href="https://www.youtube.com/watch?v=bqColbiPIWs">https://www.youtube.com/watch?v=bqColbiPIWs</a><br><a href="https://www.youtube.com/watch?v=J-_mzMOUN5A">https://www.youtube.com/watch?v=J-_mzMOUN5A</a>                                                                                                                                                                                                                                                                                                                                                                                                                                                                                                       |
| <b>Dr. Prosanta Chakrabarty</b>  | Curator of Ichthyology and Associate Professor at Louisiana State University                                                                                                                                                                         | Bioluminescent systems and historical biogeography of freshwater fishes                                                                                  | <a href="https://www.ted.com/talks/prosanta_chakrabarty_clues_to_prehistoric_times_found_in_blind_cavefish?language=en#t-31598">https://www.ted.com/talks/prosanta_chakrabarty_clues_to_prehistoric_times_found_in_blind_cavefish?language=en#t-31598</a><br><a href="https://www.ted.com/talks/prosanta_chakrabarty_four_billion_years_of_evolution_in_six_minutes?language=en">https://www.ted.com/talks/prosanta_chakrabarty_four_billion_years_of_evolution_in_six_minutes?language=en</a><br><br><a href="https://www.youtube.com/watch?v=IL-9bplZa0E">https://www.youtube.com/watch?v=IL-9bplZa0E</a><br><a href="https://www.youtube.com/watch?v=wSJPSnWvaVY">https://www.youtube.com/watch?v=wSJPSnWvaVY</a> |
| <b>Dr. Eric Edsinger</b>         | Research Scientist at the Salk Institute for Biological Studies                                                                                                                                                                                      | Cephalopod neurobiology                                                                                                                                  | <a href="https://www.sacnas.org/team-details/eric-edsinger/">https://www.sacnas.org/team-details/eric-edsinger/</a>                                                                                                                                                                                                                                                                                                                                                                                                                                                                                                                                                                                                  |
| <b>Dr. Scott Edwards</b>         | Professor of Organismic and Evolutionary Biology and Curator of Ornithology in the Museum of Comparative Zoology at Harvard University                                                                                                               | Efforts to unite genomics and natural history of birds, including phylogenetics and genome evolution                                                     | <a href="https://www.youtube.com/watchtime_continue=192&amp;v=3R7vljY2pwk">https://www.youtube.com/watchtime_continue=192&amp;v=3R7vljY2pwk</a>                                                                                                                                                                                                                                                                                                                                                                                                                                                                                                                                                                      |
| <b>Dr. Lauren Esposito</b>       | Assistant Curator and Schlinger Chair of Arachnology at the California Academy of Sciences, and the co-founder/director of a science, education, and conservation non-profit called Islands & Seas. She is also the founder of 500 Queer Scientists. | Evolution of scorpions and their venom                                                                                                                   | <a href="https://www.calacademy.org/learn-explore/science-heroes/lauren-esposito">https://www.calacademy.org/learn-explore/science-heroes/lauren-esposito</a><br><a href="https://untamedscience.com/entomologists/lauren-esposito-entomologist/">https://untamedscience.com/entomologists/lauren-esposito-entomologist/</a><br><a href="https://www.youtube.com/watch?v=2ifeU-Zxi5o">https://www.youtube.com/watch?v=2ifeU-Zxi5o</a>                                                                                                                                                                                                                                                                                |
| <b>Dr. Kory Evans</b>            | Assistant Professor in Department of Biosciences at Rice University                                                                                                                                                                                  | Evolution of phenotypic diversity and innovation by studying cranial facial structures in neotropical fish                                               | <a href="https://www.youtube.com/watch?v=UHtyoTOAyg8">https://www.youtube.com/watch?v=UHtyoTOAyg8</a>                                                                                                                                                                                                                                                                                                                                                                                                                                                                                                                                                                                                                |
| <b>Dr. Temple Grandin</b>        | Professor of Animal Science at Colorado State University                                                                                                                                                                                             | Livestock welfare and safety                                                                                                                             | <a href="https://www.youtube.com/watch?v=9Ty6vj3aPxM">https://www.youtube.com/watch?v=9Ty6vj3aPxM</a><br><a href="https://www.youtube.com/watch?v=C8xaW84b7U8">https://www.youtube.com/watch?v=C8xaW84b7U8</a><br><a href="https://www.youtube.com/watch?v=6wxewRynV3g">https://www.youtube.com/watch?v=6wxewRynV3g</a>                                                                                                                                                                                                                                                                                                                                                                                              |
| <b>Dr. Delbert André Green</b>   | Assistant Professor in Ecology and Evolutionary Biology at University of Michigan                                                                                                                                                                    | Mechanisms that constrain or promote biodiversity and utilizes monarch butterflies as a model to understand the genetic basis and evolution of migration | <a href="https://lsa.umich.edu/eeb/news-events/all-news/search-news/on-u-m-gateway--monarch-butterflies-rely-on-temperature-sensitiv.html">https://lsa.umich.edu/eeb/news-events/all-news/search-news/on-u-m-gateway--monarch-butterflies-rely-on-temperature-sensitiv.html</a><br><a href="https://lsa.umich.edu/lsa/news-events/all-news/search-news/rewriting-the-monarch-story.html">https://lsa.umich.edu/lsa/news-events/all-news/search-news/rewriting-the-monarch-story.html</a>                                                                                                                                                                                                                             |
| <b>Dr. Mimi Koehl</b>            | Professor of Integrative Biology at University of California - Berkeley                                                                                                                                                                              | Marine biology, physics, fluid and solid mechanics, and ecology                                                                                          | <a href="https://www.youtube.com/watch?v=4mdz88JvYEG">https://www.youtube.com/watch?v=4mdz88JvYEG</a>                                                                                                                                                                                                                                                                                                                                                                                                                                                                                                                                                                                                                |
| <b>Dr. Mohamed Noor</b>          | Professor of Biology and Dean of Natural Sciences at Duke University                                                                                                                                                                                 | Evolution and genetics, particularly on how species split and stay separated to form more biodiversity                                                   | <a href="https://www.youtube.com/watch?v=TtT6g043WdQ">https://www.youtube.com/watch?v=TtT6g043WdQ</a><br><a href="https://today.duke.edu/2009/02/noor.html">https://today.duke.edu/2009/02/noor.html</a>                                                                                                                                                                                                                                                                                                                                                                                                                                                                                                             |

| Name                          | Position                                                                                                                                       | Area of Study                                                                                                                                                                                                              | Resources                                                                                                                                                                                                                                                                                                                                                                                                                                                                         |
|-------------------------------|------------------------------------------------------------------------------------------------------------------------------------------------|----------------------------------------------------------------------------------------------------------------------------------------------------------------------------------------------------------------------------|-----------------------------------------------------------------------------------------------------------------------------------------------------------------------------------------------------------------------------------------------------------------------------------------------------------------------------------------------------------------------------------------------------------------------------------------------------------------------------------|
| <b>Dr. C. Brandon Ogbunu</b>  | Assistant Professor of Biology at Brown University                                                                                             | Evolutionary systems, experimental evolution, and mathematical modeling to understand the evolution of drug resistance due to complex genetic and environmental interactions                                               | <a href="https://www.youtube.com/watch?v=crGgChrrKXE">https://www.youtube.com/watch?v=crGgChrrKXE</a> <a href="https://www.evolutionsociety.org/content/new-faculty-profiles/new-faculty-profile-c-brandon-ogbunu.html">https://www.evolutionsociety.org/content/new-faculty-profiles/new-faculty-profile-c-brandon-ogbunu.html</a> <a href="https://www.wired.com/story/james-watson-and-scientific-racism/">https://www.wired.com/story/james-watson-and-scientific-racism/</a> |
| <b>Dr. Sheila Patek</b>       | Associate Professor of Biology at Duke University                                                                                              | Interface of evolution and physics by researching astonishingly fast strikes of mantis shrimp and other examples of extremely quick or powerful movements in the natural world                                             | <a href="https://www.youtube.com/watch?v=QRYF18GrDHs">https://www.youtube.com/watch?v=QRYF18GrDHs</a> <a href="https://www.pbs.org/newshour/show/why-knowledge-for-the-pure-sake-of-knowing-is-good-enough-to-justify-scientific-research">https://www.pbs.org/newshour/show/why-knowledge-for-the-pure-sake-of-knowing-is-good-enough-to-justify-scientific-research</a>                                                                                                         |
| <b>Dr. Michael Purugganan</b> | Professor of Biology at New York University                                                                                                    | Evolution of domestication process, especially in rice and date palms. He also studies the ecological and evolutionary genomics of plant environmental adaptation and the evolution of social behavior in a model protist. | <a href="https://www.youtube.com/watch?v=uyYnMk3auCl">https://www.youtube.com/watch?v=uyYnMk3auCl</a> <a href="https://www.rappler.com/thought-leaders/academe/41920-purugganan-why-i-support-golden-rice">https://www.rappler.com/thought-leaders/academe/41920-purugganan-why-i-support-golden-rice</a>                                                                                                                                                                         |
| <b>Dr. Lauren Sallan</b>      | Assistant Professor of Earth and Environmental Science and Biology at University of Pennsylvania                                               | Species persistence, diversification, and extinction on a paleontological and macroevolutionary scale.                                                                                                                     | <a href="https://www.ted.com/talks/lauren_sallan_a_brief_tour_of_the_last_4_billion_years_dinosaurs_not_included">https://www.ted.com/talks/lauren_sallan_a_brief_tour_of_the_last_4_billion_years_dinosaurs_not_included</a> <a href="https://www.ted.com/talks/lauren_sallan_how_to_win_at_evolution_and_survive_a_mass_extinction">https://www.ted.com/talks/lauren_sallan_how_to_win_at_evolution_and_survive_a_mass_extinction</a>                                           |
| <b>Dr. Sonia Tikoo</b>        | Assistant Professor of Geophysics at Stanford University                                                                                       | Lunar paleomagnetism and studies the physical effects of impact events on planetary surfaces                                                                                                                               | <a href="https://www.pbs.org/video/day-the-dinosaurs-died-rooax3/">https://www.pbs.org/video/day-the-dinosaurs-died-rooax3/</a> <a href="https://www.netflix.com/title/81121175">https://www.netflix.com/title/81121175</a> <a href="https://www.dailymotion.com/video/x6d8tba">https://www.dailymotion.com/video/x6d8tba</a>                                                                                                                                                     |
| <b>Dr. Jenny Tung</b>         | Associate Professor in the Departments of Evolutionary Anthropology and Biology at Duke                                                        | Early life events and impact on social status in primates, population genetics, and epigenetics                                                                                                                            | <a href="https://www.youtube.com/watch?v=q0bYUENyBAQ">https://www.youtube.com/watch?v=q0bYUENyBAQ</a> <a href="https://www.youtube.com/watch?v=xVO03U7M0pY&amp;index=45&amp;list=UUUntn0SbKA6sXUIMHgGXokUg">https://www.youtube.com/watch?v=xVO03U7M0pY&amp;index=45&amp;list=UUUntn0SbKA6sXUIMHgGXokUg</a>                                                                                                                                                                       |
| <b>Dr. Geerat Vermeij</b>     | Distinguished Professor of Earth and Planetary Sciences at University of California - Davis                                                    | The evolution of mollusks, particularly coevolution between predators and prey and the impact on morphology                                                                                                                | <a href="https://www.shapeoflife.org/video/geerat-vermeij-evolutionary-biologist-reading-shell%E2%80%99s-story">https://www.shapeoflife.org/video/geerat-vermeij-evolutionary-biologist-reading-shell%E2%80%99s-story</a> <a href="https://geology.ucdavis.edu/people/faculty/vermeij">https://geology.ucdavis.edu/people/faculty/vermeij</a>                                                                                                                                     |
| <b>Dr. Jessica Ware</b>       | Associate Professor at Rutgers University, Research associate at American Museum of Natural History and the National Museum of Natural History | Dragonfly flying and mating and cockroach evolution.                                                                                                                                                                       | <a href="https://www.futurity.org/pantala-flavescens-dragonfly-1121142-2/">https://www.futurity.org/pantala-flavescens-dragonfly-1121142-2/</a> <a href="https://www.youtube.com/watch?v=r_PSJ2LeNI">https://www.youtube.com/watch?v=r_PSJ2LeNI</a> <a href="https://500womenscientists.org/updates/2019/3/24/so-much-left-to-learn">https://500womenscientists.org/updates/2019/3/24/so-much-left-to-learn</a>                                                                   |
| <b>Dr. Luis Zaman</b>         | Assistant Professor in Ecology and Evolutionary Biology at University of Michigan                                                              | How evolution creates diversity and complexity and how that complexity creates a feedback loop between what evolution produces and what then becomes selectively favorable                                                 | <a href="https://www.youtube.com/watch?v=u8YN4BOUTkg">https://www.youtube.com/watch?v=u8YN4BOUTkg</a>                                                                                                                                                                                                                                                                                                                                                                             |
|                               |                                                                                                                                                |                                                                                                                                                                                                                            |                                                                                                                                                                                                                                                                                                                                                                                                                                                                                   |
